# Supplementary material
Source: PubMed Central journal article supplement (PMC2292524)
Supplement: aac_52_4_1215__1.pdf [file aac_52_4_1215__1.pdf]

**Table S2.-** Results obtained for log P from MLR analysis.

| Compound        | logPexp <sup>a</sup> | logPcalc <sup>b</sup> | logPcalc(cv) <sup>c</sup> |
|-----------------|----------------------|-----------------------|---------------------------|
| Acyclovir       | -1.56                | -1.87                 | -1.90                     |
| Althiazine      | 1.17                 | 1.36                  | 1.38                      |
| Amiodarone      | 7.57                 | 6.18                  | 5.80                      |
| Amodiaquine     | 3.99                 | 3.89                  | 3.88                      |
| Artemether      | 3.53                 | 2.29                  | 2.24                      |
| Artemisinin     | 2.9                  | 2.27                  | 2.24                      |
| Aspirin         | 1.19                 | 0.06                  | -0.02                     |
| Azatadine       | 3.59                 | 3.47                  | 3.46                      |
| Azytromycin     | 4.02                 | 3.35                  | 3.04                      |
| Baclofene       | -0.96                | 1.84                  | 1.97                      |
| Benzoquinone    | 3.43                 | 3.14                  | 3.07                      |
| Bitertanol      | 4.16                 | 4.55                  | 4.61                      |
| Chloramphenicol | 1.14                 | 0.50                  | 0.46                      |
| Chlorfenac      | 3.2                  | 3.50                  | 3.56                      |
| Ciprofloxacin   | 0.28                 | -0.26                 | -0.32                     |
| Clemizole       | 4.4                  | 4.67                  | 4.69                      |
| Clindamycin     | 2.16                 | 2.19                  | 2.19                      |
| Clofazimine     | 7.66                 | 7.55                  | 7.48                      |
| Codeine         | 1.19                 | 2.42                  | 2.46                      |
| Cortenil        | 3.08                 | 2.82                  | 2.80                      |
| Chloroquine     | 4.63                 | 3.66                  | 3.59                      |
| Dacarbazine     | -0.24                | 0.10                  | 0.12                      |
| Dapsone         | 0.97                 | 1.58                  | 1.62                      |
| Deptropine      | 5.27                 | 4.63                  | 4.57                      |
| Didanosine      | -1.24                | -0.12                 | -0.04                     |
| Dopamine        | -0.98                | -0.97                 | -0.97                     |
| Doxycycline     | -0.02                | -0.52                 | -0.60                     |
| Enprofyl        | 0.33                 | 0.21                  | 0.20                      |
| Ganciclovir     | -1.66                | -2.01                 | -2.05                     |
| Hydrocortisone  | 1.61                 | 1.19                  | 1.16                      |
| Ibuprofen       | 3.97                 | 2.90                  | 2.84                      |
| Indomethacin    | 4.27                 | 2.82                  | 2.77                      |
| Ketoconazole    | 4.35                 | 5.30                  | 5.42                      |
| Metronidazole   | -0.02                | -1.96                 | -2.34                     |
| Morphine        | 0.89                 | 1.98                  | 2.01                      |
| Nalorphine      | 1.86                 | 2.31                  | 2.33                      |
| Naphthoquinone  | 1.71                 | 2.57                  | 2.60                      |
| Norfloxacin     | -1.03                | -0.52                 | -0.46                     |
| Paracetamol     | 0.46                 | 1.43                  | 1.56                      |
| Pipemidic acid  | -2.15                | 0.04                  | 0.27                      |
| Proguanil       | 2.53                 | 3.25                  | 3.33                      |
| Pyrimethamine   | 2.69                 | 2.46                  | 2.45                      |
| Quinidine       | 3.44                 | 3.23                  | 3.22                      |
| Quinine         | 3.44                 | 3.23                  | 3.22                      |
| Sotalol         | 0.24                 | 2.16                  | 2.34                      |
| Sulfadoxine     | 0.7                  | 0.99                  | 1.01                      |

|               |       |       |       |
|---------------|-------|-------|-------|
| Testosterone  | 3.32  | 2.92  | 2.90  |
| Tinidazole    | -0.35 | -0.14 | -0.11 |
| Triclosan     | 4.76  | 4.36  | 4.32  |
| Trifluridine  | -0.46 | -1.27 | -3.39 |
| trovafloxacin | 0.31  | -0.09 | -0.14 |
| Vincristine   | 2.82  | 3.48  | 3.64  |
| Verapamil     | 3.79  | 3.02  | 2.99  |
| Vidarabine    | -1.11 | -1.40 | -1.46 |
| Vinblastine   | 3.7   | 3.55  | 3.52  |
| Zalcitabine   | -1.3  | -0.43 | -0.37 |
| Zidovudine    | 0.05  | -0.16 | -0.16 |

<sup>a</sup> from database ChemIDplus (National Library of Medicine, US) <sup>b</sup> from the mathematical model. <sup>c</sup> from cross-validation analysis

**Table S3.-** Compounds selected by mathematical models FD1 and FD2 as potentially active against liver stage of *P. yoelii* from Merck Index

| Compounds        | Therapeutic Category <sup>a</sup>          | DF1 <sup>b</sup> (class) | DF2 <sup>c</sup> (class) |
|------------------|--------------------------------------------|--------------------------|--------------------------|
| Azelastine       | Antihistaminic                             | 5.59(A)                  | 1.80(HA)                 |
| Bidisomide       | Antiarrhythmic                             | 5.19(A)                  | 4.98(HA)                 |
| Butenafine       | Antifungal                                 | 9.14(A)                  | 5.89(HA)                 |
| Butoconazol      | Antifungal                                 | 0.89(A)                  | 3.42(HA)                 |
| Cinnarizine      | Antihistaminic                             | 10.46(A)                 | -15.06(NC)               |
| Cloconazole      | Antifungal                                 | 3.12(A)                  | -4.10(A)                 |
| Cyclamic acid    | Non nutritive sweetener                    | 4.89(A)                  | -3.40(A)                 |
| Cyclandelate     | Vasodilator agent                          | 6.84(A)                  | -4.98(A)                 |
| Denopamine       | Beta adrenergic agonist                    | 5.25(A)                  | -4.05(A)                 |
| Dichlorophen     | Algicid / bactericide / fungicide          | 2.61(A)                  | 7.05(HA)                 |
| Digitalin        | Cardiotonic                                | 10.61(A)                 | -40.55(NC)               |
| Dimemorfan       | Antitussive                                | 7.46(A)                  | 0.25(A)                  |
| Dobutamine       | Cardiotonic                                | 5.75(A)                  | 1.52(HA)                 |
| Domiphen bromide | Topical anti-infective                     | 1.98(A)                  | 2.08(HA)                 |
| Doxenitoin       | Anticonvulsant                             | 5.37(A)                  | -0.72(A)                 |
| Doxycycline      | Antibiotic                                 | 2.84(A)                  | -5.93(A)                 |
| Epitiostanol     | Antineoplastic / Antioestrogenic agent     | 3.90(A)                  | -17.17(NC)               |
| Fantofarone      | Calcium channel antagonist                 | 6.35(A)                  | 2.82(HA)                 |
| Fenticonazole    | Antifungal                                 | 4.74(A)                  | -5.07(A)                 |
| Fenvalerate      | Insecticide                                | 10.37(A)                 | -0.66(A)                 |
| Flumethrin       | Insecticide                                | 9.86(A)                  | 2.13(HA)                 |
| Flunarizine      | Calcium channel blocker                    | 9.77(A)                  | -10.68(A)                |
| Fluspirilene     | Calcium channel blocker (Tranquilizer)     | 7.60(A)                  | -5.73(A)                 |
| Gallopamil       | Calcium channel antagonist                 | 9.69(A)                  | 17.46(NC)                |
| Isoxicam         | Nonsteroid                                 | 5.15(A)                  | -1.17(A)                 |
| Lercanidipine    | Antihypertensive / calcium channel blocker | 10.97(A)                 | -0.20(A)                 |
| Levocabastine    | Antihistaminic                             | 8.79(A)                  | 3.66(HA)                 |

|                               |                                          |          |            |
|-------------------------------|------------------------------------------|----------|------------|
| Lidoflazine                   | Coronary vasodilator                     | 8.83(A)  | 0.85(A)    |
| Mitotane                      | Antineoplastic                           | 0.49(A)  | 1.12(HA)   |
| Mofezolac                     | Analgesic                                | 4.33(A)  | -0.95(A)   |
| Naftifin                      | Antifungal                               | 10.43(A) | -4.03(A)   |
| Naphthacen                    | Antifungal / antibiotic                  | 9.18(A)  | -0.45(A)   |
| Naproxen                      | Analgesic                                | 3.68(A)  | -0.78(A)   |
| Nifenazone                    | Analgesic                                | 2.03(A)  | -6.75(A)   |
| Nifurprazine                  | Antifungal/topical                       | 2.68(A)  | -16.36(NC) |
| Oleandomycin                  | Macrolide                                | 6.36(A)  | -25.40(NC) |
| Omoconazole                   | Antifungal                               | 3.13(A)  | 3.78(HA)   |
| Oxyclozanide                  | Antihelminthic (flukicide)               | 0.37(NC) | 12.97(HC)  |
| Paroxypropione                | Pituitary gonadotropic hormone inhibitor | 2.90(A)  | 3.46(HA)   |
| Patchouli alcohol             | Tricyclic sesquiterpene alcohol          | 2.43(A)  | -5.11(A)   |
| Penamecillin                  | Antirheumatic                            | 5.42(A)  | -5.08(A)   |
| Phenesterine                  | Antineoplastic                           | 6.79(A)  | -12.81(A)  |
| Piperocaine                   | Local anesthetic                         | 1.04(A)  | -6.32(A)   |
| Prednimustine                 | Antineoplastic                           | 7.42(A)  | 0.91(A)    |
| Saperconazole                 | Antifungal                               | 8.50(A)  | -9.00(A)   |
| Siccanin                      | Antifungal                               | 5.53(A)  | 1.80(HA)   |
| Talastine                     | Antihistaminic                           | 6.10(A)  | 1.01(HA)   |
| Thymyl n-isoamyl<br>carbamide | Antihelminthic                           | 4.32(A)  | 10.03(HA)  |
| Zorubicin                     | Antineoplastic                           | 4.41(A)  | -0.73(A)   |

<sup>a</sup> From Merck Index.

<sup>b</sup> From discriminant function DF1.

<sup>c</sup> From discriminant function DF2.
